# Supplementary material for: Early detection of cyanide, organophosphate and rodenticide pollution based on locomotor activity of zebrafish larvae
Source: PeerJ. 2021 Dec 22;9:e12703. doi: 10.7717/peerj.12703 (PMC8710045; doi:10.7717/peerj.12703)
Supplement: Supplemental Information 1 [file peerj-09-12703-s001.xlsx]

## Sheet: Total distance moved (mm)
Methyl Parathion
Control	0.01 mg/L	0.1 mg/L	1 mg/L	10 mg/L
5761.84	4834.89	3667.4	2747.55	2937.95
3181.69	7685.06	6447.96	4743.91	1866.26
3274.04	3659.43	6684.57	3989.92	2065.51
7264.54	3055.2	8539.93	3079.96	2413.77
4841.95	4733.71	4017.27	2107.32	1108.07
6152.58	4080.6	3763.38	3283.24	2848.57
3654.1	2858.65	3154.65	4021.63	3615.6
6436.88	4392.96	4511.93	2303.88	1808.39
13471	3192.38	3835.64	2646.17	3269.26
6245.9	4791.69	7246.92	4802.1	2120.54
3660.92	5553.5	8183.16	2994.8	1482.03
4461.9	6364.01	4913.33	5599.13	1161.99
Chlorophacinone
Control	0.01 mg/L	0.1 mg/L	1 mg/L	10 mg/L
864.726	846.055	1310.88	393.118	0
1961.47	794.916	328.365	12.8045	0
1595.64	1122.07	991.014	194.202	0
3220.5	2002.79	1374.31		0
1347.35	983.81	1570.82	99.8667	0
2271.78	1432.04	2243.9	104.896	0
582.144	925.484	916.337	159.768	0
1136.62		776.358	86.4555	0
989.337	2476.75	911.831	305.427	0
2847.3	1468.5	1326.44	139.04	0
1537.6	1364.03	1186.6	183.778	0
2554.79	616.106	1387.78	171.166	0
Difenacoum
Control	0.01 mg/L	0.1 mg/L	1 mg/L	10 mg/L
4669.73	3843.31	5497.65	716.752	167.36
4476.88	5262.68	1795.2	2103.57	110.561
2200.68	1399.04	3301.01	2286.03	136.144
2191.86	2742.38	2571.68	285.511	139.447
4660.1	2799.07	4833.63	3082.43	1
2962.14	4424.2	5841.53	1827.99	125.485
4807.36	3301.7	4529.51	3439.64	181.19
2552.82	3213.28	1730.84	1035.18	16.1265
1238.32	1529.53	3773.9	3536.33	199.765
4841.94	1978.77	4968.83	4571.93	51.8127
5802.09	3541.23	1889.46	4256.35	96.0594
4291.42	4377.65	2803.55	1378.98	92.6628
Bromadiolone
Control	0.01 mg/L	0.1 mg/L	1 mg/L	10 mg/L
4367.24	3591.28	3454.61	1523.92	1315.97
3916.61	3405.76	5642.19	1752.34	2231.22
2198.76	2515.21	2732.39	4340.99	1740.22
2307.53	3654.31	5859.41	4857.37	995.387
2878.06	3151.48	3185.37	4186.21	1198.58
4243.36	3131.47	3814.17	3092.3	2348.06
4018.94	3211.31	2969.03	1530.86	1488.72
2404.54	4002.67	3384.58	1562.56	2885.86
2614.52	2352.44	1810.87	2651.86	354.628
3561.09	5576.49	2029.31	4168.7	595.551
1379.82	4636.67	3276.73	2822.31	1263.22
2047.28	2250.14	2362.04	1798.4	731.645
Diphacinone
Control	0.01 mg/L	0.1 mg/L	1 mg/L	10 mg/L
2780.93	3632.24	2909.11	1164.81	2594.47
1304.19	2953.69	513.53	4408.8	3039.39
2647.12	4386.87	450.465	4000.1	524.327
615.656	4847.33	4185.63	1685.27	633.335
7906.55	979.215	4502.01	3327.25	308.196
5315.34	3057.14	2675.51	5066.01	773.168
3215.71	3319.82	3107.57	1810.68	1412.69
978.244	3611.48	1107.09	2320.16	1650.99
3209.91	2701.13	2813.39	3477.04	1975.12
3455.1	614.944	3454.62	2466.57	3352.86
3111.97	2326.45	2594.85	3417.3	543.253
5066	2967.55	2952.13	5222.06	953.099
Brodifacoum
Control	0.01 mg/L	0.1 mg/L	1 mg/L	10 mg/L
1810.81	4721.34	3277.94	4772.62	5.61891
2811.53	3272.42	3507.98	1783.74	309.941
2789.73	3513.06	4994.29	4247.26	503.033
1954.45	3068.66	5146.91	2813.22	965.484
3433.66	4319.46	2245.44	2582.01	38.1541
1292.09	1408.3	5378.76	3026.31	52.3151
4206.97	3588.68	1418.2	2798.55	13.8388
2978	4093.83	5737.92	2192.9	311.013
3116.14	3783.55	3237.59	1629.55	73.3337
4699.21	2601.63	2985.27	1364.85	68.1322
2438.09	3425.37	3614.78	4423.21	16.9698
631.505	2782.29	2127.22	3654.58	117.153
Coumatetralyl
Control	0.01 mg/L	0.1 mg/L	1 mg/L	10 mg/L
5365.96	3559.36	5149.79	2604.27	625.986
3764.28	2442.02	3373.57	2766.75	1164.4
2068.22	2070.24	1835.28	2164.76	642.479
2197.25	2895.69	2445.99	1560.64	836.471
2142.12	1867.58	2631.69	3218.74	453.97
2965.2	3544.94	3072.11	2690.58	5.06121
2904.26	2482.65	505.926	1408.9	436.144
4936.92	2421.72	1972.37	1814.87	504.941
1880.66	2430.84	2043.08	1731.21	289.117
2708.12	3315.53	2559.42	2313.65	748.332
2914.83	3575.15	2845.41	1315.29	1.21808
2807.8	2549.41	2807.91	1229.84	700.015
Flocoumafen
Control	0.01 mg/L	0.1 mg/L	1 mg/L	10 mg/L
4959.49	3448.54	887.902	3764.54	1754.05
648.852	3123.77	991.411	2779.84	1681.77
3472.09	2285.44	1497.46	3401.98	3574.2
1382.47	841.128	1613.31	3929.93	225.885
2169.13	5630.16	4268.43	3539.08	452.315
4981.57	1939.16	1272.72	3739.36	242.971
571.499	2674.24	2674.2	2992.04	2358.88
1553.29	5976.91	6630.5	390.001	509.337
3449.06	1764.02	912.251	3904.09	557.39
1473.52	1064.33	2475.95	499.395	1094.75
1740.28	1560.96	2258.92	3662.99	153.326
5365.87	4606.87	2241.27	2429.12	474.974
Fluoroacetamide
Control	0.01 mg/L	0.1 mg/L	1 mg/L	10 mg/L
6158.14	4512	5632.19	5367.19	1024.84
3839.04	3682.66	2315.24	6502.4	1397.1
3028.97	5851.06	4802.15	4442.04	421.894
3332.95	3922.43	3090.71	4683.92	699.436
1365.13	3209.3	5392.96	2778.92	7395.25
1869.55	6785.35	4953.28	3677.31	437.568
4188.94	1708.28	4827.16	1914	1291.62
6055.44	6490.57	3197.87	6917.62	1278.54
3619.27	2558.36	3750.57	3832.38	3102.85
3532.51	4788.9	5281.6	6326.32	2316.77
4091.1	6456.91	6811.37	294.83	0
3561.43	2944.51	268.956	2141.58	0
Coumachlor
Control	0.01 mg/L	0.1 mg/L	1 mg/L	10 mg/L
2422.91	2327.55	3078.94	5414.76	771.455
6077.07	4992.9	3171.79	5005.06	1506.78
3941.67	4797.5	3712.28	3522.95	1776.46
4677.05	3962.09	4631.74	4842.55	3809.07
6701.76	4967.96	4650.25	5733.65	1643.08
4870.13	4515.76	3911.34	5562.7	1015.5
3148.85	4089.27	3126.35	5489.18	3458.07
5404.37	4130.65	6350.63	5662.55	3532.41
5775.1	3326.22	5603.42	7231.78	967.181
5208.69	3256.77	4174.36	4214.35	147.168
3751.15	4286.11	4289.77	3339.94	0
7262.28	3927.88	2763.73	0	0
KCN
Control	0.01 mg/L	0.1 mg/L	1 mg/L	10 mg/L
991.309	2314.53	1631.66	968.179	0
2144.95	997.9	2034.85	50.7762	0
1894.74	1961.57	3141.25	200.818	0
1608.35	2183.52	2022.92	286.82	0
3728.06	722.381	2194.05	119.084	0
1806.67	2659.21	864.947	962.776	0
1645.19	818.185	2812.38	1812.46	0
824.642	837.966	1554.86	646.694	0
3128.05	1654.88	684.219	1156.74	0
824.642	1668.98	1907.63	1319.26	0
2404.23	2167.37	1409.93	1154.3	0
1857.14	1125.06	1617.48	256.866	0

## Sheet: Burst count
Methyl Parathion
Control	0.01 mg/L	0.1 mg/L	1 mg/L	10 mg/L
1037	698	583	270	702
480	1579	1316	694	183
471	316	1064	237	192
1165	343	1727	523	288
943	565	590	62	72
1047	461	536	385	455
496	462	631	518	616
1323	605	594	151	210
3188	370	394	290	559
1343	868	1232	631	186
598	1060	1220	303	221
648	960	1064	1101	165
Chlorophacinone
Control	0.01 mg/L	0.1 mg/L	1 mg/L	10 mg/L
163	204	265	57	NA
467	103	55	1	NA
411	266	289	38	NA
641	502	356	84	NA
206	268	333	8	NA
418	272	406	19	NA
114	230	149	13	NA
306	1	143	22	NA
172	540	168	28	NA
680	289	266	7	NA
267	317	273	13	NA
456	99	290	30	NA
Difenacoum
Control	0.01 mg/L	0.1 mg/L	1 mg/L	10 mg/L
865	742	1682	91	12
1061	1209	332	318	42
474	132	802	330	2
401	630	420	32	13
1031	813	1039	579	22
555	913	1724	331	44
1093	702	962	711	52
667	540	255	113	641
437	306	995	743	173
1574	512	1771	917	205
1144	1127	356	908	743
1194	1073	504	272	601
Bromadiolone
Control	0.01 mg/L	0.1 mg/L	1 mg/L	10 mg/L
867	903	611	291	140
659	522	1285	273	411
390	615	473	976	296
504	801	1777	1544	163
723	798	584	820	254
1045	749	764	861	604
998	629	659	311	307
553	1139	627	273	426
559	400	369	637	27
877	1310	339	1076	52
269	746	729	793	182
347	462	517	278	117
Diphacinone
Control	0.01 mg/L	0.1 mg/L	1 mg/L	10 mg/L
449	513	515	215	421
185	732	14	1228	572
530	865	24	358	13
6	1008	1001	202	15
1175	53	845	486	4
1315	589	388	1280	51
597	610	609	196	64
185	730	127	345	244
417	497	292	409	331
847	5	461	666	603
657	338	312	837	40
	810	677	1044	115
Brodifacoum
Control	0.01 mg/L	0.1 mg/L	1 mg/L	10 mg/L
449	513	515	215	421
185	732	14	1228	572
530	865	24	358	13
6	1008	1001	202	15
1175	53	845	486	4
1315	589	388	1280	51
597	610	609	196	64
185	730	127	345	244
417	497	292	409	331
847	5	461	666	603
657	338	312	837	40
	810	677	1044	115
Coumatetralyl
Control	0.01 mg/L	0.1 mg/L	1 mg/L	10 mg/L
2736	1301	1473	683	57
1507	890	1147	831	250
548	569	463	457	111
629	763	492	262	112
651	423	676	886	33
979	900	798	743	0
820	615	92	268	22
1829	490	450	382	33
587	531	498	354	15
845	1055	491	563	79
999	1222	757	356	0
992	734	1002	348	198
Flocoumafen
Control	0.01 mg/L	0.1 mg/L	1 mg/L	10 mg/L
955	536	38	672	100
30	544	138	555	372
631	285	35	530	774
167	79	214	499	0
250	1004	869	470	8
791	319	50	515	0
35	513	458	439	51
105	941	1437	1	9
339	288	75	523	5
45	97	159	13	73
364	128	335	539	2
577	699	441	280	15
Fluoroacetamide
Control	0.01 mg/L	0.1 mg/L	1 mg/L	10 mg/L
1895	1197	1717	1580	133
940	746	465	1715	251
480	1474	1024	1065	45
834	726	582	1220	162
262	755	1209	552	2170
617	1892	1362	761	62
1240	285	1501	469	232
1983	1908	732	2299	325
605	369	740	756	756
816	956	1302	2006	474
731	1887	1765	52
817	880	19	242
Coumachlor
Control	0.01 mg/L	0.1 mg/L	1 mg/L	10 mg/L
359	1391	1376	951	14
854	1478	779	757	122
833	677	606	923	60
1140	1060	824	1109	1171
1255	1680	931	1471	193
1085	1749	1289	1713	46
505	1620	876	472	682
1349	1324	716	1418	1425
1310	1401	1452	1156	848
1002	2071	1061	1130	398
529	971	1045	357	94
1391	645	758	575	4
KCN
Control	0.01 mg/L	0.1 mg/L	1 mg/L	10 mg/L
991.309	2314.53	1631.66	968.179	NA
2144.95	997.9	2034.85	50.7762	NA
1894.74	1961.57	3141.25	200.818	NA
1608.35	2183.52	2022.92	286.82	NA
3728.06	722.381	2194.05	119.084	NA
1806.67	2659.21	864.947	962.776	NA
1645.19	818.185	2812.38	1812.46	NA
824.642	837.966	1554.86	646.694	NA
3128.05	1654.88	684.219	1156.74	NA
824.642	1668.98	1907.63	1319.26	NA
2404.23	2167.37	1409.93	1154.3	NA
1857.14	1125.06	1617.48	256.866	NA

## Sheet: Sinuosity
Methyl Parathion
Control	0.01 mg/L	0.1 mg/L	1 mg/L	10 mg/L
14821	14173.8	9831.47	10409.7	5839.08
7837.86	20659.2	15952.4	14767.1	6383.95
10276.3	12273.9	25608.8	18085.7	9388.66
21321.1	10280.4	23130.7	9101.15	8375.27
13943.4	19677.3	14518.5	10442.5	4570.4
16827.7	15562.2	15475.7	12311.3	9083.32
13212.6	8628.43	10055.9	15713.5	12926.1
17043.7	15724.1	16484.6	11585.9	7140.88
29516.5	13941.1	15614.5	12005.3	10518.1
19284.6	18122.4	26531.5	19998.3	9785.47
10504.2	14796.6	25943.9	11709.2	4832.26
10653.6	19514.1	14735	12772.9	4063.68
Chlorophacinone
Control	0.01 mg/L	0.1 mg/L	1 mg/L	10 mg/L
4129.34	5811.46	8834.27	5658.72	NA
17691.5	1567.01	2746.39		NA
14056.8	2806.16	11213.9	2015.49	NA
	16244.7	9453.88	2616.52	NA
5050.72	9697.96	8052.58	241.257	NA
10054.1	4879.79	9702.77	3604.05	NA
3849.79	5902.87	2204.35	2418.49	NA
27376.5	76.1862	3262.4	1636.25	NA
2961.62	28420.6	5529.84	1886.63	NA
23228.8	4038	5393.02	807.403	NA
5647.95	3045.39	4182.35	1564.33	NA
8184.46	2349.48	5894.29	1740.56	NA
Difenacoum
Control	0.01 mg/L	0.1 mg/L	1 mg/L	10 mg/L
36292	37829.5	68291.2	7075.57	2251.76
50576.1	49531.9	9406.48	21507.6	2468.58
14173.1	2506.14	26556.1	26797.2	1298.52
16700.5	21870.7	17801.3	736.427	1751.76
34828.7	23280.4	60206.9	43196.2	2260.24
9957.53	41051	69688.5	21994.8	2653.58
53689.3	19496.3	44438.5	52078	1679.27
24774	15324.1	6581.84	10662.4	1693.27
17704	11778.3	26715.1	72545.7	2413.58
54155.3	10649	75717.5	105320	1818.79
98872.4	37884.4	5348.97	63320.9	2295.34
40559.2	44227.9	16562.1	26987.8	1739.54
Bromadiolone
Control	0.01 mg/L	0.1 mg/L	1 mg/L	10 mg/L
32983.3	18507.8	22345.4	10252.4	140
21393.5	20530.4	82686.5	8518.03	411
12128.9	17016.5	15086.6	34089.4	296
13092.4	25123.2	72032.9	64856	163
21325.3	27680.1	17348.6	36700.7	254
44561.3	25971.2	99681.2	35428.1	604
30340	27030.8	38997.5	12504.7	307
16107.9	50568	17383.2	8377.36	426
25734.5	8815.59	9079.09	20630.9	27
32287	83989.6	13254.7	34750.7	52
7799.72	39895.2	25455	30358.1	182
7743.19	13131.9	18681.9	8089.78	117
Diphacinone
Control	0.01 mg/L	0.1 mg/L	1 mg/L	10 mg/L
12054.7	12780	8891	3381.32	6680.83
3640.35	8382.1	2949.37	9258.63	7251.77
8632.32	13231.5	1722.06	16666.7	1905.89
4033.51	9013.51	9949.25	5150.21	3537.71
25082.8	5625.59	11236.3	11937.5	1376.33
14554.9	8488.11	9574.83	14848	4338.95
9410.1	11546.3	10790.3	7159.79	7080.5
2902.09	9845.43	4701.9	9528.56	5203.55
15565	7180.8	9075.27	11461.7	5120.19
8840.6	3287.64	13248.8	6018.79	8444.47
10800	6025.3	9452.95	9777.79	2081.97
0	5729.11	10094.7	15067.8	3164.3
Brodifacoum
Control	0.01 mg/L	0.1 mg/L	1 mg/L	10 mg/L
11646.3	43016.8	16637.2	42361.5	8186.4
57355.5	18474.7	11741.6	18788.5	12473.5
32439.2	1875.43	89180.7	13195.8	8030.97
13560.6	36358.7	26619.8	21695.9	1885.34
4817.77	14745.9	64531.6	28178.2	3123.3
51244	1418.13	60746.3	33134.7	2208.03
13447	14166.9	56426.2	70147	2215.09
24381.3	4876.41	27849.4	106353	7577.1
18552.3	37907.8	17120.3	5650.37	15948.8
82198.3	60806.6	10780.3	9948.02	4666.6
4296.35	22306.4	31474.7	28411.9	2770.47
8654.03	98589.8	33242.3	25846	2757.17
Coumatetralyl
Control	0.01 mg/L	0.1 mg/L	1 mg/L	10 mg/L
79302	82936.9	70661.9	24009.4	11528.9
59201.7	42487.6	45372.6	27592.1	22937.5
20497.2	18821.1	23734	12945.4	8603.02
31130.6	21321.4	11694.8	8457.39	19545.9
25625.4	7404.12	24036.6	50673.5	4022.72
39640.4	36124	29850.4	20890.7
45739	17200.1	3838.79	6678.84	3405.16
9004	12746.7	5889.12	6400.1	3401.57
22058.4	9257.03	10608.9	11872.7	3809.69
40931.4	38990.8	10471.2	17467.4	8386.76
42344.8	58393.5	32142.2	13439
2807.8	2549.41	2807.91	1229.84	700.015
Flocoumafen
Control	0.01 mg/L	0.1 mg/L	1 mg/L	10 mg/L
1530210	938301	532494	1024540	565130
334569	847369	314562	625396	325314
856449	709721	1046710	1011750	936503
416488	401091	572895	1227930	76510.9
1049010	1827070	1307890	1515290	208876
2015000	585796	799587	1342580	109593
277936	857793	986668	1124430	1328440
792326	1851220	1184140	193893	236797
1636760	665505	401487	1672140	241232
1223850	333644	1345540	231006	446729
522915	683100	645389	1401550	43150.5
2482980	1667870	818198	985947	185441
Fluoroacetamide
Control	0.01 mg/L	0.1 mg/L	1 mg/L	10 mg/L
79506.4	40178.5	58361.6	46426.7	6021.55
16757.2	18089.7	12212	38578	12044.4
11747.2	42964.4	30107.9	37254.1	3219.45
15345.2	13236.8	23794.4	25368.2	3355.08
4443.04	13555.4	23339.5	18767.1	108314
33977.2	68126.9	31197.3	13830.2	1884.13
49143.4	9696.64	41926.4	16058.4	9232.35
80347.9	80709	13944.8	112773	26366.1
10102.4	8563.17	26712.3	22935.6	34306.7
12389.3	19426.7	37984.8	69927.5	17083
24614.6	64947.5	55963.3	1015.24
33858.2	31710.5	635.554	12419.3
Coumachlor
Control	0.01 mg/L	0.1 mg/L	1 mg/L	10 mg/L
8901.07	8886.74	13392.9	9124.71	2773.48
20867.7	8945.64	9241.16	9005.65	6011.02
9349.45	5546.05	10154.9	10154.1	5232.5
10361.4	8558.71	11123.6	11001.1	7044.17
17312.9	11754.9	10909.1	13577.6	5574.38
9202.77	14640.7	10359.3	13184.6	3210.91
9257.12	14221.6	12329.8	4563.77	9518.05
11212.4	12316.5	7742.1	10323.8	14612
9158.89	10723.1	7982.19	9582.83	7483.5
16582.7	10005.7	11838.6	12758.1	8133.9
13314.6	5983.44	13278.9	4514.15	2737.41
17952	7568.75	7798.6	6576.13	478.993
KCN
Control	0.01 mg/L	0.1 mg/L	1 mg/L	10 mg/L
51960.6	27809.9	20772.9	22212.1	NA
18702.2	25366.9	8482.29	7133.46	NA
	5972.2	43519.4	13388.4	NA
1906.85	13103.6	29241.3	9769.09	NA
64052.8	22323.6	13841.3	7471.68	NA
19840.2	8081.15	28343.9	5977.4	NA
37427.6	30564.5	73244.3	2711.66	NA
45403.5	14547.1	15349.8	32.1834	NA
22084.6	11371.2	10150.6	10051.6	NA
49023.4	51769.6	3333.46	12381.4	NA
27042.6	3479.7	13115.4	2327.21	NA
31228.8	22637.5	25022.1	7957.65	NA
